# Supplementary material for: Estimating the Snow Density using Collocated Parsivel and MRR Measurements: A Preliminary Study from ICE-POP 2017/2018
Source: Copernicus journal article supplement (doi:10.5194/egusphere-2023-3147), 2024-01-16
Supplement: Supplementary file [file egusphere-2023-3147-AC2-supplement.pdf]

Dear Reviewer,

The authors sincerely appreciate your valuable comments and suggestions to help improve the manuscript. We have revised the manuscript titled “Estimating the Snow Density using Collocated Parsivel and MRR Measurements: A Preliminary Study from ICE-POP 2017/2018”. that was submitted to ACP (Atmospheric Chemistry and Physics) on 3 January, 2024. Based on your suggestions, we have put substantial effort into additional analysis. The manuscript has been thoughtfully revised regarding the comments from all reviewers.

One of the major concerns of the proposed density retrieval algorithm using collocated MRR and Parsivel is lacking the uncertainty analysis. As per the reviewer’s suggestion, we have performed substantial investigations of the retrieval uncertainty. The impacts of the measurement uncertainty of the Parsivel and the MRR on the bulk density retrieval are analyzed quantitatively. The measurement issue of Parsivel is also investigated to understand its impact on bulk density retrieval. The results are summarized in the revised manuscript as a Discussion section.

The MRR data quality issue has been examined per the reviewer’s suggestion. The post-processed data have replaced entire MRR raw data by applying the algorithm from Maahn and Kollias (2012). All the bulk density, bulk water fraction, and reflectivity-weighted velocity retrievals have been recalculated. The figures have been revised as well.

The original purpose of utilizing reflectivity-weighted velocity to filter adequate retrieval is no longer needed and has been removed in the revised manuscript. The quality of the retrieval results have been greatly improved by applying the post-processed MRR data per the reviewer’s suggestion. The low SNR MRR measurement has been removed. The comparison of reflectivity-weighted velocity is mainly used to identify the inadequate retrieval due to the attenuation effect on MRR reflectivity.

The performance of the retrieved bulk density has been validated by the snowfall rate (SR) from collocated Pluvio measurements and reflectivity-weighted fall velocity ( $V_z$ ) from MRR. In addition to SR and  $V_z$ , the performance of the retrieved bulk density has been compared with the precipitation imaging package (PIP), a video disdrometer (Newman et al., 2009; Pettersen et al., 2020). The PIP was also deployed at the MHS site during ICE-POP 2018 (Tokay et al., 2023). The comparison of retrieved bulk density between the proposed algorithm in this study and PIP has shown good agreement with each other. The high consistency further confirms the performance of the retrieved bulk density. Since there is no direct bulk water fraction measurement for validation, the authors consider the validation of bulk density retrieval to PIP and Pluvio as “indirect” evidence to support the bulk water fraction retrieval.

The SR and Vz validation analysis shows that the algorithm can adequately retrieve the bulk density and bulk water fraction. The consistency of the retrieved bulk density to collocated PIP confirms the performance of the proposed algorithm in this study. The advantage of the proposed algorithm is that it utilizes collocated Parsivel and MRR, which are commercially available, commonly used, and robust instruments. The Parsivel and MRR can operate unattended and need little maintenance. Further application of the proposed algorithm helps derive long-term observation data on snow properties. The authors believe the proposed algorithm can provide an alternative choice if sophisticated instruments (e.g., 2DVD, PIP, SVI, MASC) are unavailable.

The manuscript has also been revised carefully following the reviewer's suggestions on English wording. The authors would like to express our sincere appreciation for the comments. The point-to-point replies to every comment have been prepared. Please see the following replies. The added or modified sentences in the revised manual are in red for your convenience. We would appreciate any feedback on the revisions.

General Comments #####

1. High sensitivity of  $Z_{HH}$  to the liquid portion of the particle allows for precise bulk water fraction estimation.

The study provides no evidence that the bulk water (liquid) fraction produced by the retrieval is consistent with actual bulk liquid water fraction. The claim that the retrieval can estimate bulk liquid water fraction is supported only by a brief argument regarding the differing sensitivity of the retrieval forward model to the water and ice volume fractions.

**Reply: The bulk water fraction is derived along with the maximum possible bulk density in the proposed method in this study. If different assumption is made in the selection of possible bulk density, the retrieved bulk water fraction will be different. Therefore, the performance of the retrieved bulk water fraction is linked with bulk density retrieval. Since there are no direct measurements of bulk water fraction, we will compare the retrieved bulk density from the proposed method and PIP. The consistency between retrieved bulk density from two algorithm confirms that the retrieved bulk water should be reasonable. Please see Figure R1.**

**As shown in Fig. R1(a), the retrieved bulk density values from the proposed algorithm and PIP gradually decrease from nearly 1.0 to 0.1 ( $\text{g cm}^{-3}$ ) between 03 and 06 UTC. Both algorithms capture the transition from the mixing-phase to dry snow. Please see Figure R1 in the previous reply. The manuscript has been revised to include the discussion of the bulk water fraction retrieval. Please see Line 398-413.**

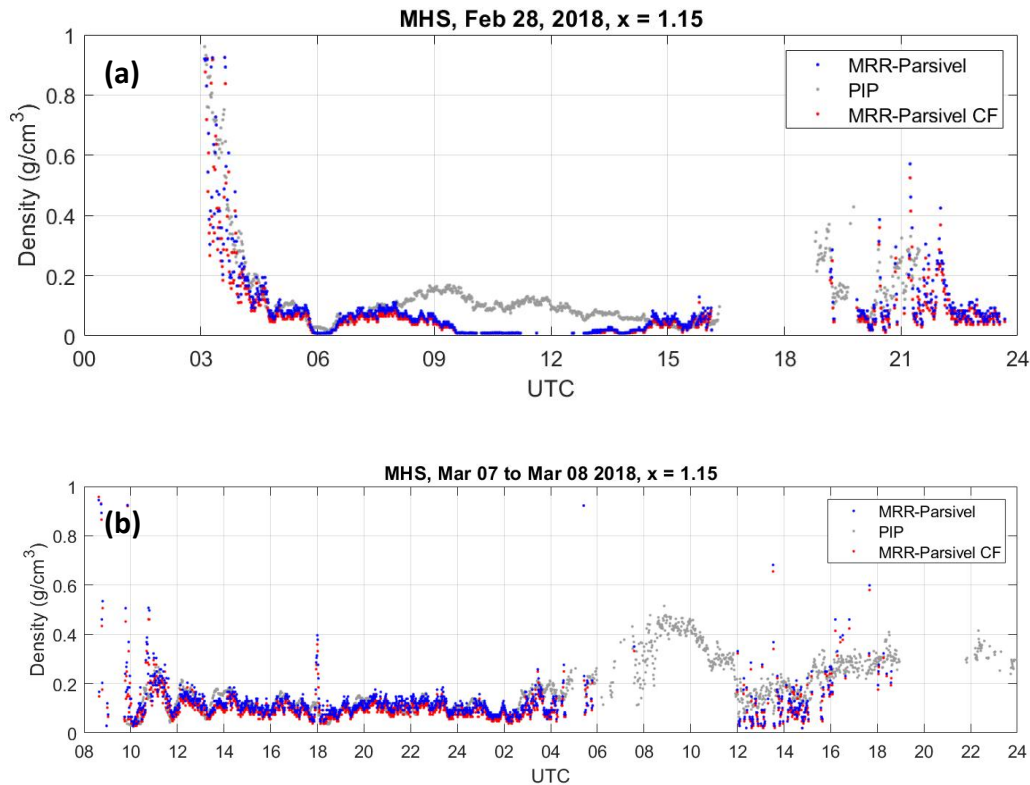

**Figure R1: (a) The retrieved bulk density from collocated MRR and Parsivel. The blue dots are retrieved from CF-adjusted PSD. The red dots are from the original PSD. The gray dots are the retrieval from PIP. The case is 28 February 2018. (b) Same as (a), but for case 7 March 2018.**

2. The use of  $V_z$  as a filter improves agreement between measured snowfall rates and snowfall rates estimated from the bulk-density retrievals.

Again, this isn't supported. The study describes retrieval performance using only data to which the filter has already been applied. It does not show retrieval results when the filter is not applied, so no judgement can be made about the effects of the filter.

**Reply: We did calculate the SR before and after  $V_z$  filter, and the results did show great improvements. As per the reviewer's suggestion of the data quality of MRR, the MRR data has been replaced by the post-processed data by applying the algorithm from Maahn and Kollias (2012). All of the retrievals of the bulk density, bulk water fraction and reflectivity-weighted velocity have been recalculated. The original noisy retrieval results have been removed due to low SNR. The  $V_z$  calculation is no longer used to remove noisy bulk density retrieval. The  $V_z$  comparison is derived to verify the overall performance of bulk density retrieval. In addition, the  $V_z$  can identify the inadequate bulk density retrieval due to attenuation effect on MRR reflectivity. Please see Line 185-187.**

3. Microphysical similarity between two warm low synoptic events confirms the dependence of the micro-scale factors on the synoptic conditions.

The results from the study show similarities in the retrieved microphysical properties for these two events, but that is not sufficient to support the conclusion. Perhaps other synoptic setups would produce similar microphysical properties, negating this conclusion.

**Reply: The warm low events (28 February 2018 and 7 March 2018) shown in the manuscripts are the events that have the most accumulated snowfall during ICE-POP. The 28 February case is shown to demonstrate that the retrieved snow density is reasonable when compared to Pluvio SR. However, some discrepancy of the calculated  $V_z$  from retrieved bulk density and measurements of  $V_z$  from MRR can be noticed. The discrepancy is due to the attenuation effect on MRR antenna. The authors do not intend to emphasize the similarity of microphysical properties. These two events are to demonstrate the detail evolution of the bulk density retrieval results. The discussion has been revised. Please see Lines 339-357.**

4. Differences in bulk density and water fraction between mountain sites and coastal sites are indicative of geographical and synoptic environmental effects on the distinct microphysical characteristics of winter precipitation systems.

The geographical effects are suggested somewhat by the results from the second case study, but as noted in regards to conclusion #3, synoptic control can't be demonstrated using two cases with similar synoptic setup. Further, although the authors discuss differing meteorological properties at the coastal and mountain locations, there is no demonstration that the coastal and mountain sites differ in moisture availability.

**Reply: The number concentration of the retrieved bulk density is shown in Fig. 14. Both dry snow and mixing-phase events are shown in both warm-low and cold-low events. The median values of the retrieved bulk density of each site are shown in Fig. 14a,b. The temperature ( $^{\circ}\text{C}$ ) and water vapor pressure (hPa) measurements from nearby mountain and coastal AWS sites are collected and summarized in Fig. 14e. The warm-low events have warmer and moister conditions compared to cold-low events. The warm- and cold-low events in the coastal area have similar mean temperature values. On the other hand, the water vapor pressure increases significantly from cold-low to warm-low events. The mountain area has similar features but with higher temperature increments and fewer increments of water vapor pressure. Please see Lines 339-357 of the revised manuscript.**

A. There are no estimates of retrieval uncertainties. This makes it impossible to determine, for example, if differences between the observed and retrieval-derived snowfall rates are significant.

**Reply: The retrieval uncertainty is investigated as per the reviewer's suggestion. The retrieval uncertainty analysis is performed by considering the assumption of particle shape, Parsivel measurement uncertainty, and the MRR measurement uncertainty. Please see the Discussion section for detail retrieval uncertainty analysis, Lines 358-417.**

B. The description of the methodology is not sufficient. For example, a Rayleigh reflectivity model is described, but that is not what is used in the radar forward model. Also, the description of how the ice and liquid volume fractions are determined in the retrieval is unclear and not well justified.

**Reply: The description of the methodology has been improved as per the reviewer's suggestion. The description of the calculation of reflectivity has been revised to improve the clarity. The equation 2 is no longer Rayleigh reflectivity model. The backscattering cross-section ( $\sigma$ ) replaces  $D^6$  in equation 2. The reference of Bringi and Chandrasekar (2001) is provided to replace Huang et al. (2010). The ice and water are assumed to be evenly distributed within the particle. Please see Lines 125-171 of the revised manuscript.**

C. The reflectivity and Doppler velocity data from the MRR require reprocessing to be representative of snowfall. See Maahn and Kollias (2012). It's not clear if this or similar reprocessing was performed.

**Reply: The MRR data has been post-processed as per the reviewer's suggestion. The values of bulk density and bulk water fraction have been recalculated. The impact of the  $Z_{HH}$  difference to the values of bulk density and bulk water fraction can be considered as the retrieval uncertainty due to MRR reflectivity measurement uncertainty. The results are shown in Discussion section. Please see Lines 111-114.**

D. The discussion of results, particularly for the 7-8 March 2018 case, needs to be better organized and cleaned up to more clearly bring focus to the significant patterns in the results.

**Reply: The discussion of the 7-8 March 2018 case has been rewritten to improve the clarity. Please see Lines 278-322.**

E. There are assumptions of spherical particles in both the particle scattering calculations and in the fallspeed calculations, but only limited discussion of whether they are adequate for use with snowflakes and at the MRR's frequency.

**Reply:** The discussion of non-spherical particles has been introduced in the revised manuscript. Non-spherical and spherical particle measurements are different when MRR looks upward. However, the orientation of the non-spherical particle is assumed to be isotropic and homogeneous. A sensitivity investigation assuming the particle axis ratio of 0.5 has been conducted. The results show that about 1.5 dBZ variation of simulated reflectivity can be induced due to the assumption of particle size.

A random error of MRR reflectivity with a standard deviation of 1.2 dB is introduced into the retrieval algorithm to imitate the particle assumption and MRR measurement uncertainty. The overall standard deviation of bulk density retrieval uncertainty is about 0.025 (g cm<sup>-3</sup>) for a given MRR reflectivity uncertainty of 1.2 dB. The bulk water fraction retrieval has the same feature, and the uncertainty is about 0.041. Please see the Discussion section in (Lines 358-417) the revised manuscript.

F. The particle "size" measured by the Parsivel is ill-defined for snow particles. For background, in addition to Battaglia et al., see also Wood et al. (2013). This makes it difficult to make useful comparisons of bulk particle densities that are determined using different types of disdrometer measurements (e.g., Figure 13).

**Reply:** In Figure 13, the bulk density comparison among this study, Heymsfield et al. (2004), and Brandes et al. (2007) does not intend to emphasize the difference. We convert  $D_0$  to  $D_m$  by assuming exponential PSD ( $D_m = D_0^{4/3.67}$ ). Considering distinct environmental conditions, instrumentations, and retrieval techniques, most of the particles in this study are consistent with the  $\rho_{bulk} - D_m$  relation from Heymsfield et al. (2004) and Brandes et al. (2007). These results indicate that the proposed bulk density estimation algorithm can derive accurate retrievals with statistically consistent microphysical characteristics from previous studies. Please see Lines 324-338.

F. In further revision, English-language usage and grammar could be improved. I have tried to include some comments in the details below that may be helpful.

**Reply:** Authors sincerely appreciate the reviewer's help. We have done all the correction as per both reviewer's suggestion. We will further improve the manuscript by asking professional assistance from English editor.

Line-by-line comments: #####

Abstract \*\*\*\*\*

L9: Does "bulk water fraction" mean bulk \*liquid\* water fraction? And is this the volume fraction or mass fraction?

Also, here and in other places, be careful how you use words to describe what you are retrieving. Here you say "hydrometeor's bulk density and bulk water fraction". This implies you are retrieving these properties for individual particles, which is not correct. You are retrieving the bulk density and bulk water fraction for populations of particles.

**Reply: The sentence has been revised to improve the clarity. "derive bulk density and bulk water fraction of a population of particles ...". Please see Line 9. The bulk water fraction is the volume fraction, not the mass fraction. Please see Lines 126-128.**

L13: The meaning of "The combination of minimum water fraction subsequently determines the bulk density" is not clear.

**Reply: The sentence has been revised to improve the clarity. "The combination of minimum water fraction and maximum ice fraction subsequently determines the bulk density ( $\rho_{bulk}$ )." Please see Lines 13-14.**

L15-16: The meaning of "self-evaluation" in this context is not clear. L20-21: Regarding "a similar transition", from what state to what state?

**Reply: The "self-evaluation" has been removed in the revised manuscript. "The estimated  $\rho_{bulk}$  was examined independently by comparison of the liquid-equivalent snowfall rate (SR) of collocated Pluvio." Please see Lines 15-16.**

L21: Again, you are retrieving population properties, not the properties of individual particles.

**Reply: The sentence has been revised to improve the clarity. Please see Lines 21-22.**

L28: Do you actually mean "liquid water content" here, which usually means the concentration (e.g., grams per cubic meter) of liquid water?

**Reply: Yes, authors refer liquid water content (LWC, g cm<sup>-3</sup>). The LWC has been constantly retrieved by dual-polarimetric radar measurements.**

Introduction \*\*\*\*\*

L30-31: This doesn't seem to be an example of either of the prior two statements in this section. What is it intended to exemplify?

**Reply: The examples intend to show how microphysical parameterizations in numerical forecast models can be improved by validating with the snow property obtained from observational data. The sentence has been revised to improve the clarity. Please see Lines 33-44.**

L33-34: It's not specifically the increase in liquid phase fraction that causes the fallspeed of an individual particle to increase. It is the change in particle aerodynamics, specifically the reduction in particle size and horizontally-projected area while particle mass stays constant) that causes the fallspeed to increase.

**Reply: The sentence has been revised as per the reviewer's suggestion. Please see Line 38-39.**

L38-39: It is not clear what point the authors are making with this statement. How is the work by Morrison and Milbrandt important to this work?

**Reply: The study from Morrison and Milbrandt (2015) proposed a new microphysical scheme that parameterizes the density of hydrometers. A robust density estimation algorithm can evaluate microphysical simulations from numerical models. Please see the revised manuscript, Line 44.**

L40: I think that "inhibits" is not the correct word here.

**Reply: The typo has been corrected. Please see Lines 30.**

L47: The results of Brandes et al. (2007) were limited to 52 cases over two winter seasons and isolated to a particular location. It doesn't seem correct to me to describe it as "climatological".

**Reply: The "climatological" has been removed. Please see Lines 48.**

L50-51: The meaning of "differentiation of riming degree" is unclear.

**Reply: The sentence has been revised to improve the clarity. Please see Lines 51-52.**

L54: Perhaps "above the 2DVD" would be clearer.

**Reply: The sentence has been revised as per the reviewer's suggestion. Please see Line 55.**

L55: I think that it is the difference that is minimized.

**Reply: The sentence has been revised as per the reviewer's suggestion. Please see Line 55.**



L61: I think "disdrometer" is more commonly used.

**Reply: The “distrometer” has been revised to “disdrometer”. Please see Line 69.**

L64: "transmits" instead of "transmitted".

**Reply: The “transmitted” has been revised to “transmits”. Please see Line 71.**

L65: "scatters" instead of "scattered".

**Reply: The “scattered” has been revised to “scatters”. Please see Line 72.**

L67: See earlier comment re "distrometer".

**Reply: The “distrometer” has been revised to “disdrometer”. Please see Line 74.**

L73-74: The meaning of "regarded as the self-evaluation of our result" is not clear.

**Reply: The "regarded as the self-evaluation of our result" has been removed to improve the clarity. Please see Lines 81-82.**

Instruments and Data Processing \*\*\*\*\*

L85: Horizontal wind can cause problems with Pluvio and Parsivel measurements. Was any filtering or correction applied based on ambient wind speed?

**Reply: All of the Pluvios were equipped with double windshields. The Pluvio at the MHS was within the DFIR (double fence intercomparison reference) in addition to the double shield. The environmental condition of all sites are introduced in the revised manuscript, please see Lines 99-102.**

L90-91: What are the elevations of the sites?

**Reply: The elevations of each site are, YPO (772 m MSL), MHS (789 m a.m.s.l.), CPO (855 m MSL), BKC (175 m MSL), and GWU (36 m MSL). Each site's detailed layout and information can be found in Kim et al. (2021). The reference is added in the revised manuscript. Please see Lines 96-98.**

L93-95: Is it actually the PSD data that were filtered (PSD data do not include fall velocities)? Or was it the single-particle size and fallspeed data that were filtered? How does this filtering affect the calculated PSDs? Does it reduce particle counts?

**Reply: The Parsivel single-particle size and fallspeed data were filtered. The minute Parsivel data was quality-controlled using the fall velocity filtering technique (Lee et al. 2015). The filtering removes the outlier particles, reducing particle counts. Subsequently, the PSD was calculated from the filtered data. The manuscript has been revised to improve clarity. Please see Lines 107-110.**

L96: What is the vertical resolution of the MRR data? What is the altitude above ground level of the third gate?

**Reply: The MRRs had the same configuration during ICEP-POP; the vertical resolution was 150 m, and there were 31 gates up to 4.65 km. The third gate is 450 m above ground. The vertical resolution information has been added to the revised manuscript. Please see Lines 111-114.**

L104-106: "Bias" already implies that an average was taken, no need to say "mean bias". What are the standard deviations of the differences between the MRR  $Z_{HH}$  and the simulated  $Z_{HH}$ ? This would provide some insight into the uncertainty of the bias estimates.

**Reply: The “mean bias” has been revised to “bias” per the reviewer’s suggestion. The number concentration plot of MRR measured reflectivity, and Parsivel PSD calculated reflectivity, as shown below in Figure R2. The standard deviation of the differences between them is about 1.1 to 1.3 dB for each site (shown in Table 2 of the revised manuscript). As the reviewer indicates that the standard deviation value can be considered as the MRR reflectivity uncertainty. The standard deviation will be further applied to investigate the bulk density retrieval uncertainty.**

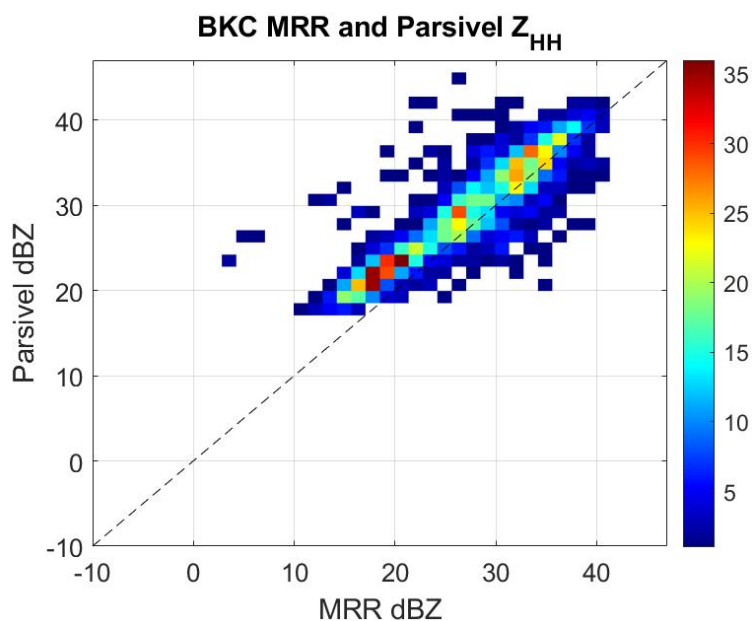

**Figure R2: The number concentration distribution measured of reflectivity from MRR and simulated reflectivity from Parsivel of BKC site. The bias is -2.1 dBZ, and the standard deviation is 1.28 dBZ.**

Methodology \*\*\*\*\*

L107: In the entirety of the Methodology section, there is no discussion of how uncertainties are determined for the retrieved properties or properties derived from the retrieval results.

**Reply: As per the reviewer's suggestion, the retrieval uncertainty has been investigated and summarized in the revised manuscript. A Discussion has been added in the revised manuscript. Please See Lines 358-417.**

**With 1.2 dB MRR reflectivity uncertainty, the retrieval bulk density uncertainty is about 0.023 g cm<sup>-1</sup>. An Discussion section has been added for discussing the retrieval uncertainty. Please see Lines 386-397.**

L112-114: It is unclear why the Huang et al. study is introduced at the beginning of the methodology. The Rayleigh assumption used by Huang et al is clearly not appropriate for K-band radar (MRR) observing snowfall, so equation 2 is not applicable. The actual equation for estimating  $Z_{HH}$  using T-matrix backscatter cross-sections and attenuation is never presented or discussed.

**Reply: Authors agree with reviewer's comment. Since T-Matrix simulation is used and the Rayleigh assumption is not used in the retrieval algorithm, the equation 2 has been revised. The reference has also been changed to Bringi and Chandrasekar (2001). The sentence of Rayleigh assumption is removed to improve the manuscript's clarity. Please see Lines 130-134.**

L121: "modified from Huang et al.", I believe.

**Reply: The typo has been corrected. Please see Line 138.**

L126-127: More details are needed here. How were the dielectric properties of the mixed ice/liquid/air particles determined? How was the liquid water assumed to be distributed within a particle?

**Reply: The ice and water are evenly distributed within the particle. The manuscript has been revised to improve the clarity. Please see Lines 144-145.**

L128-130: It's not clear to me why spherical shapes were assumed just because the snow particles are observed from the bottom. I believe the particles would still appear to be non-spherical. It is not clear that spherical particle T-matrix calculations are appropriate for modeling snowflake backscattering a K-band.

**Reply: Non-spherical and spherical particles do appear differently when looking upward. However, the orientation of the non-spherical particle is assumed to be isotropic and homogeneous. A sensitivity investigation assuming the particle axis ratio of 0.5 has been conducted. The results show that about there is about a 1.5 dBZ variation of simulated reflectivity can be induced due to the assumption of particle size.**

**A random error of MRR reflectivity with a standard deviation of 1.2 dB is introduced to imitate the particle assumption and MRR measurement uncertainty to the retrieval uncertainty. The overall standard deviation of bulk density retrieval is about 0.025 (g cm<sup>-3</sup>) for a given MRR reflectivity uncertainty of 1.2 dB. The bulk water fraction retrieval has the same feature and the uncertainty is about 0.041. Please see Discussion section in the revised manuscript. Please See Lines 358-417.**

L138-144: Something seems off about the results shown in Figure 2. The size distribution in panel (a) shows the size distribution consists of small particles and that the concentrations of those particles are small. I would expect the radar reflectivity to be small, in the neighborhood of 0 to 3 dBZ with typical ice densities for snowflakes based on other field experiment results I've examined with similar size distributions. Yet according to the dashed blue line in panel (b) the calculated reflectivity reaches over 18 dBZ, even with very small ice densities and virtually no liquid water.

Please check these calculations.

**Reply: The calculated reflectivity values reaching over 18 dBZ is due to the high water fraction and high dielectric constant. The calculated reflectivity from PSD is ranging from -5 to 35 dBZ, the values do cover 0 to 3 dBZ (low ice and water fraction). The 18 dBZ is the reference reflectivity value from MRR to constrain the retrieved bulk density. We will use the bulk density retrieval from precipitation imaging package (PIP) to verify the calculation of T-Matrix simulation and retrieved density.**

**The PIP, a video disdrometer, provides the PSD, fall speed, density, and snowfall rate of hydrometers (Newman et al., 2009; Pettersen et al., 2020) was also deployed at the MHS site during ICE-POP 2018. Tokay et al. (2023) have utilized PIP to investigate the PSD parameters, including mass-weighted diameter and normalized intercept. The bulk density is estimated by Tokay et al. (2023) with various assumptions. The PIP retrieved**

density was generated from the assumption that  $D_{\max} = 1.15 D_{\text{eq}}$ , and the mass derivation included was based on Bohm (1989). The time series of retrieved bulk density from proposed algorithm and PIP are shown in Fig. R1.

We change the data time of Figure 2 to 1559 UTC in the revised manuscript. The PSD has higher concentration of particles, thus the reflectivity values are ranging from – 5 to 50 dBZ. The MRR reference reflectivity is 22.23 dB. Please see the Fig. 2 in the revised manuscript. As shown in Fig. R1, the retrieved bulk density from the proposed algorithm (blue and red dots) and the PIP (gray dots) are in good agreements. The bulk density was about  $0.07 \text{ (g cm}^{-1}\text{)}$  from both methods. The consistency of retrieved bulk density confirms the calculation of the bulk density and the simulated reflectivity from PSD. The discussion of the consistency between the proposed method and the PIP has been included in the the revised manuscript. Please see Lines 388-413 (the Discussion section).

L145-150: I don't see this recommendation in Huang et al., so I think it is necessary to explain more fully the reasoning for this approach and to describe more completely the details of the approach. Do you mean that given the observed reflectivity, you would just pick the largest  $v_i$  that reproduces that reflectivity? Why?

**Reply:** One difference between our algorithm and Huang et al.'s (2010) is the assumption of the particle composition. Huang et al. (2010) assumed that a mixture of snow contains only ice and air. Please see page 642 of Huang et al. (2010), "To calculate the backscattering properties of the particles measured by the 2DVD, we consider snow to be a mixture of ice and air." The assumption of only ice and air from Huang et al. (2010) is the same as the  $v_w$  (water fraction) equals zero in Fig. 2b. The bottom part of Fig. 2b (e.g.,  $v_w = 0$ ) is exactly the same as Huang et al. (2010).

In our proposal algorithm, the reflectivity calculation fully considers water/ice/air fractions. Therefore, various water/ice/air fraction combinations can be derived from the matched reflectivity between MRR measurement and Parsivel calculation. To determine the bulk snow density from these possible combinations of  $v_w/v_i$ , the bulk density with maximum  $v_i$  (minimum  $v_w$ ) with maximum bulk density is selected, similar to Huang et al. (2010)'s assumption. The manuscript has been revised to improve the clarity, please see Lines 157-171.

L149-153: This part of the methodology also requires more complete explanation and evidence. I'm not sure I follow and agree with your argument here.

**Reply:** The bulk water fraction is derived along with the maximum possible bulk density in the proposed method in this study. If different assumption is made in the selection of

possible bulk density, the retrieved bulk water fraction will be different. Therefore, the performance of the retrieved bulk water fraction is linked with bulk density retrieval. Since there are no direct measurements of bulk water fraction, we will compare the retrieved bulk density from the proposed method and PIP. The consistency between retrieved bulk density from two algorithm confirms that the retrieved bulk water should be reasonable.

As shown in Fig. R1(a), the retrieved bulk density values from the proposed algorithm and PIP gradually decrease from nearly 1.0 to 0.1 ( $\text{g cm}^{-3}$ ) between 03 and 06 UTC. Both algorithms capture the transition from the mixing-phase to dry snow. Please see Figure R1. The manuscript has been revised to include the discussion of the bulk water fraction retrieval. Please see Line 398-413.

Since T-matrix is being used rather than equation (2), it may not be clear to many readers how the liquid and ice water dielectric factors come into play. I expect you are using some form of mixing rule (e.g., Maxwell-Garnet?). I think explanation needs to be provided about how the particle dielectric properties are determined for a mixture of ice and liquid water and how this influences backscattering properties as  $v_i$  and  $v_w$  change.

Further, Figure 2b seems to show that there is only a narrow range of the solution space ( $v_w = 0.015$  to  $0.1$  with  $v_i < 0.5$ ) for which  $Z$  might be said to be moderately more sensitive to  $v_w$  than to  $v_i$  due to liquid water's larger dielectric constant. Also, how is this sensitivity to  $v_w$  influenced by your method for choosing  $v_i$ ? Clearly, if you pick the maximum  $v_i$  for this case, there is much weaker sensitivity of  $Z$  to  $v_w$ . Finally, it is not clear what is meant by "The change of  $v_w$  can be ... obtained ...".

**Reply:** The mixing rule of Maxwell-Garnet is applied in T-Matrix calculation. The influence of  $v_i/v_w$  composition to the backscattering properties has been discussed in the manuscript. Please Lines 134-135.

As the reply to the previous comment, the performance of the retrieved bulk water fraction is linked with bulk density retrieval. Since there are no direct measurements of bulk water fraction, we will compare the retrieved bulk density from the proposed method and PIP. The retrieved bulk density values from the proposed algorithm and PIP gradually decrease from nearly 1.0 to 0.1 ( $\text{g cm}^{-3}$ ) between 03 and 06 UTC in Fig R1(a). Both algorithms capture the transition from the mixing-phase to dry snow. Please see Figure R1. The manuscript has been revised to include the discussion of the bulk water fraction retrieval. Please see Line 398-413.

L153-156: For clarity, I would briefly describe both approaches here, then follow with more detailed descriptions of each one. What is meant by "self-verified"?

**Reply: The description has been revised to improve the clarity. The original purpose of utilizing reflectivity-weighted velocity to filter adequate retrieval is no longer needed and has been removed in the revised manuscript. The quality retrieval results have been greatly improved by applying the post-processed MRR data per the reviewer's suggestion. The low SNR MRR measurement has been removed. The comparison of reflectivity-weighted velocity is mainly used to identify the inadequate retrieval due to the attenuation effect on MRR reflectivity. Please see Lines 185-187.**

L157-165: This is for spherical particles. Do you assert it is appropriate for snow particles? How does this relationship compare with Mitchell and Heymsfield (2005) or Heymsfield and Westbrook (2010)? These newer fallspeed models are more appropriate for snowflakes.

**Reply: As per the reviewer's suggestion, the retrieval results has been greatly improved after applying the post-processed MRR data (Maahn and Kollias 2012). The noisy bulk density has been removed. The original purpose of removing inadequate bulk density retrieval by reflectivity-weighted velocity is no longer needed. The reflectivity-weighted velocity comparison is obtained for two purposes. First, the comparison intends to examine the overall performance of the retrieved bulk density. The overall consistency is shown in Fig. 3. Second, the "bulk density-derived" reflectivity-weighted velocity is obtained to identify antenna attenuation issue as shown in Fig. 5(e). The issue of spherical particle assumption on terminal velocity calculation has been discussed in the revised manuscript. Please see Lines 218-221.**

L166-167: This is not a correct statement. Both  $V_z$ \_MRR and  $Z$ \_MRR (which is used to constrain the retrieval) are derived from the same basic measurements of Doppler spectra. So they are not independent.

**Reply: The manuscript has been revised as per the reviewer's suggestion. Please see Lines 185-187.**

L168-169: But what were this "various issues"?

**Reply: The manuscript has been revised as per the reviewer's suggestion. Please see Lines 185-187.**

L170-171: So, my understanding is that, for the data presented in the results, any retrievals with retrieved  $V_z$  greater than observed  $V_z$  plus one standard deviation are excluded. Is that

correct? How does the 1-sigma uncertainty in the observed Vz compare against the 1-sigma uncertainty in the retrieved Vz?

**Reply: The Vz criteria for removing inadequate bulk density retrieval is no longer needed. As per the reviewer's suggestion, the retrieval results have been greatly improved after applying the post-processed MRR data (Maahn and Kollias 2012). The noisy bulk density has been removed. The Vz difference is mainly for identifying the attenuation effect of MRR reflectivity. Please see Lines 185-187.**

L176: I think the term on the right of the summation needs to be multiplied by the size bin width ( $\Delta D_i$ ) before summation.

**Reply: The typo has been corrected. Please see Line 191.**

L178: Perhaps "compared against" rather than "examined with".

**Reply: The sentence has been revised as per the reviewer's suggestion. Please see Line 193.**

Results \*\*\*\*\*

L184: The Results contain no assessments of uncertainties in the observations ( $Z_{HH}$ ,  $V_z$ , PSD, SR) , in the retrieved properties (bulk particle density, bulk liquid water fraction), or in the properties derived from the retrieval results ( $Z_{HH}$ ,  $V_z$ , SR). How are we to determine if the retrieval results and  $V_z$  and SR biases, for example, are significant or not?

**Reply: As per the reviewer's suggestion, the discussion of the retrieval uncertainty has been included in the revised manuscript. Please the Discussion section for more detail. (Lines 358-417).**

Reflectivity-weighted ( $V_z$ ) =====

L197: -0.27 to 0.03 is the range in bias values only, not related to standard deviation.

**Reply: The Vz has been recalculated by using post-processed MRR data. The values of standard deviation are provided in the submitted manuscript. The sentence has been revised to improve the clarity. Please see Lines 206-216 in the revised manuscript.**

L199: Clarify that this is the bias and standard deviation for all site results combined.



**Reply: The bias and standard deviation is all site results combined. The sentence has been revised to improve the clarity. Please see Lines 212-213 in the revised manuscript.**

L200-201: It would be appropriate to acknowledge this limitation earlier in the paper where the method is introduced.

**Reply: More discussion has been added in the revised manuscript. Please see Lines 217-221.**

L203: Usually, "mixed-phase".

**Reply: The typo has been corrected. Please see Line 219.**

L203-204: Again, there is a vague reference to "measurement issues", but there has been no descriptive discussion or quantification of them.

**Reply: The discussion has been revised. Please see Lines 214-221.**

L206-207: This kind of filtering (omitting data from further analysis simply because the data don't give results that match other observations) tends to negate or reduce the believability of the proposed method. This is especially true when the authors cannot point to specific physical conditions that caused the method to fail. How much data was filtered at this stage? How poor are the subsequent results if the data are not filtered?

**Reply: The Vz criteria for removing inadequate bulk density retrieval is no longer needed. As per the reviewer's suggestion, the retrieval results have been greatly improved after applying the post-processed MRR data (Maahn and Kollias 2012). The noisy bulk density due to low SNR has been removed. The post-processed MRR data has been greatly improved its sensitivity. The Vz difference is mainly for identifying the attenuation effect of MRR reflectivity. Please see Lines 215-216 of the revised manuscript.**

Liquid-equivalent snowfall rate (SR) =====

L215-216: Snow gauges like the Pluvio can have problems with undercatch when surface winds are strong. Were the winds checked and any filtering or corrections applied? The bias in the density-derived SR versus the Pluvio SR might be worse if the Pluvio data are corrected for undercatch.

**Reply: All of the Pluvios were equipped with double windshields. The Pluvio at the MHS was within the DFIR (double fence intercomparison reference) in addition to the double**

**shield. The environmental condition of all sites are introduced in the revised manuscript, please see Lines 99-102.**

L216-219: This is the first mention of snow/ice accumulation on the MRR antenna. It would be appropriate to mention that this occurred during the description of the observations earlier in the paper.

**Reply: The discussion of the attenuation effect of MRR due to snow/ice accumulation on the antenna has been added in the revised manuscript. Please see Lines 213-216.**

L224: Should be "moist air".

**Reply: The typo has been corrected. Please see Line 238.**

L227-228: For the case study of the 28 February event, why is only the MHS site data analyzed?

**Reply: The 28 February 2018 event is selected to demonstrate the retrieval results. The consistency of SR calculated from retrieved bulk density and measurement from Pluvio indicate that the proposed algorithm performs reasonably well. The pronounced attenuation effect of MRR reflectivity and its impact to underestimate  $V_z$  are shown to demonstrate the retrieval uncertainty. The other sites show almost exactly the same evolution of the retrieved properties. In addition, the PIP was deployed at MHS and collocated with MRR and Parsivel. The comparison of retrieved bulk density from our method and PIP is discussed in the revised manuscript. To keep the manuscript concise, only MHS site of 28 February is shown. More detailed analysis of each site of 7 March 2018 is discussed.**

Case study: 28 February 2018 =====

L258: Regarding "fall velocity was more significant than  $1 \text{ m s}^{-1}$ ", I suggest rewording this to avoid confusion with statistical significance.

**Reply: The sentence has been revised to improve the clarity. Please see Line 271.**

L263: Regarding "derivation density", do you mean "derived density"?

**Reply: The typo has been corrected. Please see Lines 276.**

L263-264: Are you describing the \*maximum\* particle sizes?

**Reply: The typo has been corrected. Please see Lines 276.**

Case study: 7 March 2018 =====

L268-269: "produced prominent precipitation" and "produced intensive precipitation" sounds like repetition, are both needed?

**Reply: The "produced prominent precipitation" has been removed. Please see Lines 280-281.**

L273-310: There are a number of locations on these lines that describe bulk water fraction. See my major comments above - I don't think the capability of the retrieval to distinguish and quantify bulk water fraction (or volume fraction of liquid water) has been demonstrated.

**Reply: The bulk water fraction is derived along with the maximum possible bulk density in the proposed method in this study. If different assumption is made in the selection of possible bulk density, the retrieved bulk water fraction will be different. Therefore, the performance of the retrieved bulk water fraction is linked with bulk density retrieval. Since there are no direct measurements of bulk water fraction, we will compare the retrieved bulk density from the proposed method and PIP. The consistency between retrieved bulk density from two algorithm confirms that the retrieved bulk water should be reasonable. Please see Figure R1.**

**As shown in Fig. R1(a), the retrieved bulk density values from the proposed algorithm and PIP gradually decrease from nearly 1.0 to 0.1 (g cm<sup>-3</sup>) between 03 and 06 UTC. Both algorithms capture the transition from the mixing-phase to dry snow. Please see Figure R1 in the previous reply. The manuscript has been revised to include the discussion of the bulk water fraction retrieval. Please see Line 398-417.**

L286: Regarding "which are in accord with the distributions of all velocity-diameter relations", it is not clear to me what this means.

**Reply: The sentence has been revised to improve the clarity. Please see Lines 295-296.**

L288: Regarding "They gradually dissipated", it is not clear what "They" is referring to.

**Reply: "They" refers "the precipitation". The sentence has been revised to improve the clarity. Please see Lines 299.**

L293-294: Regarding "Hence, it implies more ... confirm the distribution of fall velocity and diameter". The meaning here is not clear to me.

**Reply: The sentence has been revised to improve the clarity. Please see Lines 302-303.**

L296: Regarding "confirmed by the alike contrast", the meaning of "alike contrast" is not clear.

**Reply: The sentence has been revised to improve the clarity. Please see Lines 306-308.**

L298: Not true, YPO, MHS and CPO, BKC show mostly near-zero bulk water fraction. For most of this discussion, need to be clear about when only-elevated, only-coastal, or all sites are being described.

**Reply: Only BKC and GWU feature high bulk water fractions. The sentence has been revised to improve the clarity. Please see Line 309.**

L300: "Transited" should be "transitioned".

**Reply: The type has been corrected. Please see Line 312.**

Statistical analysis of bulk density and bulk water fraction

=====

L317-320: What is the basis of the assertion that Brandes et al. (2007) observations were dominated by "almost spherical aggregates"? Brandes et al. appear to have used the equivalent volume diameter as determined by the 2DVD software, as particle sizes. These, will be different than the particle size determined by the Parsivel. Brandes et al. do use the median volume diameter to parameterize the bulk density; however it is not evident that the cases in this study and those of Brandes et al. involved similar meteorological conditions. Evidence should be presented for this claim.

**Reply: The statement “dominated by almost spherical aggregates” can be found in the abstract of Brandes et al. (2007). Considering distinct environmental conditions, instrumentations, and retrieval techniques, most of the particles in this study are consistent with the  $\rho_{bulk} - D_m$  relation from Heymsfield et al. (2004) and  $\rho_{bulk} - D_0$  from Brandes et al. (2007). These results indicate that the proposed bulk density estimation algorithm can derive reasonable retrievals with statistically consistent microphysical characteristics from previous studies. The manuscript has been revised to improve the clarity. Please see Lines 324-338.**

L321-325: The particle sizes used in Heymsfield et al. (2004) are derived from aircraft particle probes, as you have noted. These particle sizes are probably more like the "maximum dimension" of the particle and less like the "equivalent diameter" determined by a Parsivel. Additionally, Heymsfield et al. relate density to mass mean diameter, not to median volume

diameter. So the comparison described here is somewhat an "apples to oranges" comparison. It is not surprising there are differences.

**Reply: Since the two papers are using different parameter ( $D_m$  and  $D_0$ ) to present mean size, we convert  $D_0$  to  $D_m$  by assuming exponential PSD ( $D_m = 4D_0/3.67$ ). Moreover, the bulk density comparison among this study, Heymsfield et al. (2004), and Brandes et al. (2007) does not intend to emphasize the difference. The discussion has been rephrased. The Figure has been revised. Please see Figure 13 and Lines 324-338.**

L335-344: As I noted above, I am not convince that this method is capable of accurately distinguishing and quantifying the liquid and ice volume ratios and the corresponding bulk water fraction. Also, although it is asserted that there are differences in the meteorology of the warm-low and cold-low events (i.e., "warmer and moister environments" for the warm-low events), no meteorological data is provided to support this.

**Reply: As per the previous comments and replies, we have compared the retrieved bulk density from the proposed algorithm and PIP retrieval (see below figures) and the SR with Pluvios. The bulk water fraction is derived along with the maximum possible bulk density in the proposed method in this study. If different assumption is made in the selection of possible bulk density, the retrieved bulk water fraction and bulk density will be different. Therefore, the performance of the retrieved bulk water fraction is linked with bulk density retrieval. Since there are no direct measurements of bulk water fraction, we compared the retrieved bulk density from the proposed method and PIP. The consistency between retrieved bulk density from two algorithm confirms that the retrieved bulk water should be reasonable.**

As shown in Fig. R1(a), the retrieved bulk density values from the proposed algorithm and PIP gradually decrease from nearly 1.0 to 0.1 ( $\text{g cm}^{-3}$ ) between 03 and 06 UTC. Both algorithms capture the transition from the mixing-phase to dry snow. Please see Figure R1 in the previous reply. The manuscript has been revised to include the discussion of the bulk water fraction retrieval. Please see Line 398-417.

As the reply to the previous comment. The temperature ( $^{\circ}\text{C}$ ) and water vapor pressure (hPa) measurements from nearby mountain and coastal AWS sites are collected and summarized in Fig. 14e. The warm-low events have warmer and moister conditions compared to cold-low events. The warm- and cold-low events in the coastal area have similar mean temperature values. On the other hand, the water vapor pressure increases significantly from cold-low to warm-low events. The mountain area has similar features but with higher temperature increments and fewer increments of water vapor pressure. Please see Lines 351-357.

L345: It is probably more appropriate to say that the density of snow varies with "imposed weather conditions".

**Reply: The sentence has been revised to improve the clarity. Please see Lines 419.**

Conclusions \*\*\*\*\*

L347-350: As I've noted, I have concerns about the bulk water fraction estimates. I don't believe sufficient proof of the capability has been provided, and in no way has evidence been provided that the values are "precise". The high sensitivity of  $Z_{HH}$  to the liquid portion of the particle led to precise bulk water fraction estimation. It implied better capability of the density variation due to bulk water fraction change (ex. melting) in the proposed method in this study.

**Reply: Thanks reviewer's suggestion. As per the previous comments and replies, we have compared the retrieved bulk density from the proposed algorithm and PIP retrieval (see below figures) and the SR with Pluvios. The bulk water fraction is derived along with the maximum possible bulk density in the proposed method in this study. If different assumption is made in the selection of possible bulk density, the retrieved bulk water fraction will be different. Therefore, the performance of the retrieved bulk water fraction is linked with bulk density retrieval. Since there are no direct measurements of bulk water fraction, we compared the retrieved bulk density from the proposed method and PIP. The consistency between retrieved bulk density from two algorithm confirms that the retrieved bulk water should be reasonable.**

**As shown in Fig. R1(a), the retrieved bulk density values from the proposed algorithm and PIP gradually decrease from nearly 1.0 to 0.1 ( $\text{g cm}^{-3}$ ) between 03 and 06 UTC. Both algorithms capture the transition from the mixing-phase to dry snow. Please see Figure R1 in the previous reply. The manuscript has been revised to include the discussion of the bulk water fraction retrieval. Please see Line 398-417.**

L352: Clarify what is meant by "self-evaluation".

**Reply: The sentence has been revised. Please see Lines 424-425.**

L357: There's no evidence shown that applying the  $V_z$  criteria improves the consistency of retrieved SR with observed SR.

**Reply: The  $V_z$  criteria is no longer needed. Please see the revised manuscript, Lines 424-427.**

L359: Is "all available cases" true? SR comparison are shown only for two cases at the sites.

**Reply: The SR comparisons from the cases listed in Table 1 are summarized in Table 3. Please see the revised manuscript, Lines 428-430.**

L364-365: I don't think this statement is supported. This study has investigated two cases which have similar synoptic setups and has found similarity of microphysical characteristics. But you haven't demonstrated that different synoptic setups will produce microphysical characteristics dissimilar to these.

**Reply: The statement has been revised to avoid confusing and improve clarity. Please see Lines 431-435.**

L366: I would suggest "contrasting" or "dissimilar" rather than "contrastive".

**Reply: The typo has been corrected. Please see Line 436.**

Tables and Figures \*\*\*\*\*

Table 3: Note previous comment about "mean bias". Also, why is the Vz criterion for "ALL" shown as "nan"? To help us understand the significance of the biases and standard deviations, please also include the associated mean values and standard deviations of the observed quantities.

**Reply: The "mean bias" has been revised to "bias". The Vz criterion is no longer needed. The mean values of Vz and SR are provided. Please see the Table 3 in revised manuscript.**

Figure 6: Is the colorbar axis labeled correctly? Were there really counts ranging up to  $10^{50}$ ?

**Reply: The typo has been corrected. It should be  $10^5$ . Please see Fig. 6 in the revised manuscript. Fig. 12 also has the same mistake, and also been corrected.**

Figure 12: Why does the mountainous MHS site maintain a population of high-fall-velocity small particles throughout the 7-8 March event?

**Reply: As indicated by the study from Battaglia et al. (2010), Parsivel's fall velocity measurement may not be accurate for a snowflake particle. This is due to the internally assumed relationship between horizontal and vertical snow particle dimensions. Friedrich et al. (2016) indicate that Parsivel can suffer from splashing of particles (observed as a small diameter with large fall velocity when particles fall on the head of the sensor) and margin fallers (observed as a faster velocity than true fall velocity when particles fall through the edge of the sampling area). Yuter et al. (2006), Aikins et al. (2016), and Kim et al. (2021) indicate the splashing and border effects of the diameter of**

**< 1 mm in Parsivel fall velocity measurements. The Parsivel data shown in Figure 12 was quality-controlled, as suggested by Lee et al. (2015). The discussion of fall velocity measurement uncertainty is added in the revised manuscript. Please see Lines 105-109.**
